# Supplementary material for: Prevalence of risk factors associated with rupture of abdominal aortic aneurysm (AAA): a single center retrospective study
Source: PeerJ. 2023 Aug 4;11:e15752. doi: 10.7717/peerj.15752 (PMC10405793; doi:10.7717/peerj.15752)
Supplement: Supplemental Information 1 [file peerj-11-15752-s001.xlsx]

## Sheet: sheet 1
Patient ID	Rupture（1=Rupture/0=Non-rupture）	Gender（男1=male/2=female）	Age, year	Smoking state(1=Current/2=Former/3=Never)	Drinking state(1=Current/2=Former/3=Never)	Hypertension(1=Yes/2=No)	SBP（mmHg)	DBP（mmHg)	Diabetes mellitus(1=Yes/2=No)	HbA1c(%)	Fast glucose(mg/dL)	CHD history(1=Yes/2=No)）	LVEF（%）	Maximum diameter（cm）	diameter（<5,5-7,>7)	diameter（<4.0;4-7;>7)	cTnI ng/ml	BNP pg/ml	hsCRP mg/L	Homocysteine μmol/L	Creatinine umol/L	D-dimer mg/L	HDL-C mmol/L	LDL-C mmol/L	TG mmol/L	TC mmol/L	ApoA1 g/L	ApoB g/L	ApoB/ApoA1
A1	1	2	80	3	3	1	115	84	1	6.2	9.32	2	65	5.8	2	2	0.2	225.4	44.91		98.4	13.19	0.61	1.64	1.76	2.81	0.79	0.6	0.759494
A2	1	1	71	2	3	2	116	67	2	6.3	4.13	1	41	8.2	3	3	0.079	51.8	67.01	22.7	275.6	2.87	1.04	2.97	1.52	4.32	0.85	0.91	1.07059
A3	1	1	89	3	3	2	96	52	2	5.8	14.28	2	63	7	2	2	0.03	94.1	6.7		149.7	16.97	0.67	0.76	0.72	2.13	0.83	0.25	0.301205
A4	1	2	85	3	3	1	135	70	2	5.6	8.81	2	64	6	2	2	0.004	68.2	75.63		74.7	16.52	0.99	1.71	1.12	3.24	0.74	0.6	0.810811
A5	1	1	63	1	3	1	117	75	2	5.6	7.16	2	61	9	3	3	0.025	11.5	7.94		188.8	20.00	0.79	2.84	1.48	4.69	0.67	0.95	1.41791
A6	1	1	68	3	3	1	149	108	2	5.4	7.88	2	63	9	3	3	0.003	50.5	47.15		126.3	1.97	0.66	2.07	1.75	3.84	0.87	0.59	0.678161
A7	1	1	65	3	3	1	155	100	2		6.68	1	36	4.9	1	2	0.539	130.6			307.6	1.21
A8	1	1	82	2	3	1	157	77	2	6.6	6.52	2	64	5	2	2	0.083	18.8	167.32		224.4	3.69	0.87	1.87	2.04	3.46	0.73	0.58	0.794521
A9	1	2	58	3	3	2	110	64	2	5.7	5.69	2	63	8.8	3	3	0.001	30.9	1.26	7.66	31.5	1.17	1.17	3.47	0.88	5.09	1.04	0.94	0.903846
A10	1	1	79	3	3	2	134	82	1	6.41		1	68	4.7	1	2	0.001	507.8	195	8.27	85.5	2.61	1.25	3.34	0.91	4.78	0.79	1.06	1.34177
A11	1	1	77	1	1	1			2	6	4.87	2	62	8.7	3	3	0.147	29.7	67.11	15.76	303.8	20.00	0.54	1.68	2.03	2.76	0.53	0.72	1.35849
A12	1	1	67	3	1	1	139	96	2	5.7	6.12	2	65	3	1	1	1.204	62.6		20.85	183.3	3.00	0.99	1.73	1.91	3.6	0.81	0.57	0.703704
A13	1	1	66	3	3	1	102	79	2	6.3	7.73	1	60	5.1	2	2	19.246	81.2	174.87	9.14	150.6		0.53	2.11	0.78	3.41	0.48	0.7	1.45833
A14	1	1	81	2	3	2	36	69	2	5.6		2	60	3.8	1	1	0.011	148.5	283.54	10.91	121.4		0.98	2.52	1.1	4.74	0.67	0.78	1.16418
A15	1	2	70	3	3	1	74	56	1			2	60	10.1	3	3
A16	1	1	54	1	3	1	80	51	1			1		5	2	2	1.711	155.2			299.9
A17	1	1	61	3	3	2	102	71	2	5.8	7.02	2	60	8.5	3	3	0.479	56.2	74.16	11.48	88	1.09	1.33	1.3	0.4	2.83	0.93	0.43	0.462366
A18	1	1	86	3	3	2	149	90	2	5.8	7.8	2	62	6.4	2	2	0.001	1191	82.82		91.2	4.51	0.99	2.07	0.71	3.67	0.7	0.69	0.985714
A19	1	1	62	1	3	2	95	58	2	6.1	6.32	2	62	8.5	3	3	0.134	207	187	20.2	226	3.73	0.93	2.25	2.62	4.21	0.92	0.85	0.923913
A20	1	1	80	3	3	1	107	75	2	6.1	7.25	2	61	6	2	2	0.006	95.6	125	17.42	98.5		1.3	1.97	1.23	3.65	1.15	0.74	0.643478
A21	1	1	78	2	3	2	70	40	2		11.8	2	59	8.2	3	3	0.002	107			192	2.48
A22	1	2	60	3	3	2	102	56	2	6.2	8.21	2	66	7	2	2	0.003	142	0.65	9.5	138	4.32	0.71	1.29	5.06	4.6	0.57	0.44	0.77193
A23	1	1	71	3	3	2	121	70	1	7.2	6.82	1	64	6.3	2	2	0.111	75.7	86.78	17.5	128.1	3.31	0.63	1.28	1.37	2.36	0.85	0.9	1.05882
A24	1	1	76	3	3	2	139	88	2	5.7	5.03	2	58	6.2	2	2	0.003	1155	73.63	11.5	174.6	5.00	0.93	1.38	0.91	2.73	0.62	0.56	0.903226
A25	1	2	64	3	3	1	176	84	1	5.9	5.76	1	68	5.5	2	2	0.005	176	26	10.7	81		0.9	3.05	4.57	6.8	0.86	0.75	0.872093
A26	1	1	58	2	3	1	123	103	1		7.64	1	61	9.2	3	3		115		9.3	96.8	2.61	0.86	2.65	1.75	4.59	0.82	0.86	1.04878
A27	1	1	80	3	3	1	168	134	2	5.4	6.07	1	60	3.3	1	1	0.006	2113	147.3	14.4	171	3.31	0.69	1.27	1.2	2.27	0.42	0.58	1.38095
A28	1	1	63	2	3	2	88	37	2		16.52	1	57	7.7	3	3	0.448	200	35	25.3	261	1.93	0.67	1.49	0.97	2.58	0.57	0.43	0.754386
A29	1	1	86	1	2	2	128	78	2	5.5	4.19	1	63	8.4	3	3	0.188	5663	134.68	11.2	95	4.01	1.34	2	1.18	3.85	0.92	0.76	0.826087
A30	1	1	53	2	3	1	91	74	2	6	13.15	2	63	6.9	2	2	0.037	537	48.3	13.4	307	1.69	0.41	0.9	3.36	2.49	0.58	0.29	0.5
A31	1	1	82	3	3	2	136	102	2	5.1	8.26	1	69	6.9	2	2	0.001	184	118	15.9	113.9	3.22	1.05	2.11	1.11	3.95	1	0.6	0.6
A32	1	1	75	2	3	1	180	100	1	8.1	10.33	2	66	1.8	1	1	0.005	597			108	1.86	0.89	2.12	0.98	3.4	0.74	0.6	0.810811
A33	0	1	77	2	2	1	160	77	2	6.2	5.75	1	62	8.4	3	3	0.009	98.9			61	10.11	1.08	1.63	1.06	2.94	1.05	0.55	0.52381
A34	0	1	79	3	3	1	161	75	2		5.3	2		3	1	1	0.005	129.4	2.37		95.8		1.27	2.42	1.52	3.93	0.99	0.69	0.69697
A35	0	1	65	3	3	1	126	65	2	6.4	11.07	2	66	6.5	2	2	0.005	18.8	28.52		87.4	3.00	0.99	2.54	1.7	4.82	1.06	0.91	0.858491
A36	0	1	66	1	2	1	137	89	2	5.9	3.67	1	61	5	2	2	0.01	17.6	0.05	18.06	35.7	2.22	1.25	2.36	0.98	3.73	1.04	0.71	0.682692
A37	0	1	69	1	2	2	176	107	2	4.6	4.65	2	62	5.2	2	2	0.01	21.5	0.22		36.4	20	1.07	1.75	0.69	2.87	0.89	0.51	0.573034
A38	0	1	68	3	3	2	91	60	2	5.8	5.2	2	60	4.1	1	2	0.01	13.1			49.7	2.1	1.15	3.55	2.1	5.32	1.04	1.04	1
A39	0	1	49	1	2	1	126	91	2	5.8	3.82	1	69	5.7	2	2	0.02	44			41	2.95	1.38	2.97	1.26	4.62	0.98	0.89	0.908163
A40	0	1	86	3	3	1	116	77	2		14.79	1	64	3.7	1	1	0.01	171.1			38.6	3.09
A41	0	1	77	3	3	2	144	96	2	6.2	5.16	2	63	4.8	1	2	0.04	128.6	4.52	13.98	36.4		1.55	2.67	1.38	4.4	0.98	0.75	0.765306
A42	0	1	73	1	3	1	156	74	2			1	62	4.3	1	2	14	14.6	0.36	0.04	38.9	13.5	1.57	8.77	5.13		1.32	1.35	1.02273
A43	0	1	66	1	3	2	88	49	2	5.7	6.83	1	44	3.7	1	1	0.05	312.6	23.93	21.87	85.2	3.66	1.19	3.59	1.77	5.31	0.87	1.24	1.42529
A44	0	1	69	1	3	1	146	80	1		5.29	1	44	5.2	2	2	0.04	369.7	21.9	18.48	792.8	2.85
A45	0	1	77	1	3	2	124	79	2	6	4.53	2	66	4.5	1	2	0.003	13.4	31.9	16.57	110.7	1.54	0.71	2.88	3.02	4.32	0.71	1.02	1.43662
A46	0	1	87	3	3	2	92	64	2	5.3	5.96	1	12	5.4	2	2	0.08	1032.6	53.05		109.4		1.09	2.19	1.15	3.33	0.69	0.74	1.07246
A47	0	1	73	1	3	1	156	74	2	6.2	5.16	1	62	4.3	1	2	0.04	128.6	135	13.98	132.9		1.55	2.67	1.38	4.4	0.98	0.75	0.765306
A48	0	2	83	3	3	1	98	62	2	5.7	7.14	1	36	5.9	2	2	33.223	2168.4	71.96		159.9	2.07	1.27	2.72	2.16	5.04	1.21	1.07	0.884298
A49	0	1	68	3	3	2	145	90	2	6.9	6.21	1	63	3.6	1	1	0.01	10	0.45		103.1	0.69	0.99	2.46	1.43	3.72	0.84	0.84	1
A50	0	1	72	1	3	2	146	80	2	4.9	5.75	2	63	4.2	1	2	0.01	10	44.1		76.2		1.68	2.68	2.04	4.54	1.53	0.89	0.581699
A51	0	1	79	1	3	2	122	66	2	6.3	5.56	2	60	5.7	2	2	0.01	152.8	131		163.3	3.13	0.68	1.21	0.91	1.89	0.51	0.37	0.72549
A52	0	1	76	1	3	1	142	75	2	7	7.03	2	55	1.9	1	1	1.52	818.9	183.09		138.8	2.03	0.79	2.27	1.2	3.4	0.6	0.76	1.26667
A53	0	1	71	1	3	1	130	84	2	5.5	5.23	2	63	4.4	1	2	0.01	31.4	0.84		104.7	1.74	1.26	3.15	1.28	4.52	0.96	0.86	0.895833
A54	0	1	80	1	3	2	130	112	2	5.4	3.75	1		5.3	2	2	0.01	185.1	1.37		75.3		1.47	2.52	1.11	4.04	1.04	0.72	0.692308
A55	0	1	72	1	3	2	133	85	2	6	5.21	2	67	3.7	1	1	0.01	12.5	137.49		95	1.47	1.35	3.1	1.1	4.78	1.08	0.96	0.888889
A56	0	1	59	1	3	1	132	88	2	5.4	5.95	1	62	6.4	2	2	0.01	93.5	17.2		141.9		1.15	2.96	1.39	4.33	0.99	0.91	0.919192
A57	0	1	76	3	3	2	117	75	2	5.3	7.91	1	65	5	2	2	1.624	123.2	171		218	13.99	0.79	3.41	1.44	4.99	0.67	0.89	1.32836
A58	0	1	68	1	1	1	135	74	2	6.2	6.96	2	82	4.9	1	2	0.01	56.7	90.7		133.5	1.16	1.25	3.34	5.29	4.59	1.08	0.97	0.898148
A59	0	1	64	3	3	1	124	80	1	6.9	4.22	2	70	3.5	1	1	0.01	17			69.1	7.75	1.16	2.04	1.28	3.26	0.9	0.7	0.777778
A60	0	2	84	3	3	1	145	62	1	7.4	7.3	1	62	3	1	1	6.28	297.3	0.98		72.6	0.61	1.52	2.77	1.76	4.53	1.3	0.86	0.661538
A61	0	1	72	3	3	1	152	96	2	5.5	5.72	1	34	8	3	3	0.61	5000	67.97		185.8	20.15	0.92	2.62	1.2	3.75	0.8	0.93	1.1625
A62	0	1	72	1	3	2	117	72	2		5.42	1	28	5.4	2	2	0.02	289	32.05		93.8	20	1.18	2.39	0.99	3.65	0.94	0.81	0.861702
A63	0	1	82	1	3	1	148	85	1	10.4	7.14	1	49	2.6	1	1	0.01	137	131		73.5	1.22	1.2	2.62	1.01	3.9	0.84	0.78	0.928571
A64	0	2	86	3	3	1	174	110	2	5.9	6.44	2	69	3.4	1	1	0.01	60.4	11.3		58.8	2.36	1.75	3.1	5.33	4.8	1.42	0.79	0.556338
A65	0	1	70	3	3	1	164	104	1	5.2	4.63	1	41	1.7	1	1	0.02	1299.2	1.08		120.2	1.87	0.62	1.33	1	2.03	0.62	0.5	0.806452
A66	0	1	73	3	3	1	148	100	1	6.2	9.54	1	52	4.1	1	2	1.17	1403	26.1		358.3	13.54	1.13	2.36	2.4	4.36	0.9	0.8	0.888889
A67	0	1	85	3	3	1	122	70	2	5.9	5.67	1	60	4.7	1	2	0.67	539.5	140	15.68	414		0.9	2.46	1.16	3.79	0.61	0.86	1.40984
A68	0	1	76	3	3	1	137	57	2	6.3	4.95	1	63	5.5	2	2			0	20.38	122.2		1.57	1.74	1.14	3.29	1.12	0.57	0.508929
A69	0	1	76	1	3	1	137	84	2	6.2	5.51	2	65	6.5	2	2	0.018	23.5	0.85	13.25	99.5	1.26	1.37	3.86	1.1	5.92	1.18	1.17	0.991525
A70	0	1	77	3	3	2	130	71	1	7.5	8.16	2	40	4.6	1	2	0.841	81.2	48	7.22	113.4	7.5	1.17	2.11	1.37	3.69	0.97	0.72	0.742268
A71	0	1	79	3	3	1	192	106	2	5.5	5.34	1	60	9.5	3	3	0.011	321.9	0	20.08	154.8		1.27	2.41	2.2	4.55	1.11	0.86	0.774775
A72	0	1	94	3	3	1	114	82	2	4.6	4.19	1	50	6	2	2	0.024	101.9	24.92	13.19	69.2		1.71	1.71	0.59	3.18	0.96	0.54	0.5625
A73	0	1	74	2	3	1	150	103	2	5.8	4.96	1		3.8	1	1	0.004	51.6	48.42		80.3	2.38
A74	0	1	52	1	3	1	132	83	1	9.1	9.55	1	62	3.4	1	1	0.002	10	2.72	16.07	81.5		1.02	1.14	14.69	7.52	1.05	1.04	0.990476
A75	0	1	75	3	3	2	148	87	2	5.9	5.07	1	66	4.1	1	2	0.011	155.6	17.6		96.3	1.59	0.99	3.4	2.82	5.07	0.91	1.11	1.21978
A76	0	1	69	1	3	2	113	77	2	6.4	5.39	2	60	3.6	1	1	0.002	10	0.81		102	0.63	1.11	3.54	3.14	5.54	1.04	1.04	1
A77	0	2	77	3	3	2	133	86	2	5.8	5.44	1	60	6.3	2	2	0.002	22.7	29.66		49.9	2.91	1.3	3.6	2.28	5.42	1.08	1.1	1.01852
A78	0	1	65	3	3	1	200	100	2	5.6	5.8	1	60	4	1	2	0.006	19.5	4.82		72.8	2.6	0.58	2.67	4.25	4.37	0.67	1.02	1.52239
A79	0	1	74	1	1	2	134	74	1	7.2	4.91	1	66	5.6	2	2	0.012	14.7	0.16	10.84	129.1		1.49	1.72	0.96	3.12	1.2	0.63	0.525
A80	0	1	89	1	3	2	108	74	2	6	5.36	1	63	5.1	2	2	0.002	51.9	74.8		120.6	10.61	1.09	2.37	0.73	3.82	0.92	0.61	0.663043
A81	0	2	85	3	3	1	142	85	2	4.5	4.21	2	58	5.3	2	2	0.004	35.2	0.81		65.2	12.46	1.5	2.89	1.36	4.7	1.2	0.89	0.741667
A82	0	1	69	3	3	2	115	72	2	6.3	4.72	1	53	4.8	1	2	0.006	41	0.97	9.62	67.6	1.07	1.61	2.78	0.68	4.43	1.23	0.82	0.666667
A83	0	1	66	3	3	1	129	85	2	5.6	4.96	2	66	4.2	1	2	0.01	89.5	26.1		251.9		0.99	3.42	1.36	4.94	0.83	1.09	1.31325
A84	0	1	65	3	3	1	155	82	2	5.7	5.36	2	62	3.1	1	1	0.008	29.8	115.96	12.09	103.6		1.2	2.22	1.08	3.93	0.97	0.64	0.659794
A85	0	1	70	3	3	2	97	55	2	4.8	4.37	2	65	3.5	1	1	0.001	110	42.1		59.5	7.82	1.79	2.14	0.92	4.3	1.27	0.65	0.511811
A86	0	1	70	3	3	1	107	69	1	6.1	5.95	1	31	2.9	1	1		248.3	194	10.35	110.7		0.39	1.83	1.07	2.55	0.35	0.73	2.08571
A87	0	1	56	3	3	2	129	81	2	5.8	4.94	2	62	2.7	1	1			42.5	10.68	74		0.63	2.59	2.32	4.06	0.68	0.82	1.20588
A88	0	1	79	1	3	1	156	98	2	6.3	4.45	1	62	7.2	3	3	0.002		17.9	13.34	102.5		0.91	3.46	1.55	4.93	1.03	0.93	0.902913
A89	0	1	74	1	3	1	144	69	1	8.7	4.12	1	56	4	1	2	0.014	1315.8	9.43	12.53	117.5	9.19	0.96	3.18	0.99	4.45	0.74	0.98	1.32432
A90	0	1	67	3	3	2	132	82	2		5.23	2	67	3.2	1	1	0.01	35	15.68		73.7		0.85	3.2	2.03	4.44	0.78	1.1	1.41026
A91	0	2	65	3	3	1	125	87	2	6.3	5.64	2	63	6	2	2	0.006	62.6	12.2		51.8	7.19	1.25	2.14	0.93	3.66	1.24	0.55	0.443548
A92	0	1	66	3	3	1	119	65	2		6.07	1	64	4.5	1	2	0.044	146	31.34		690	5.14	1.12	2.76	0.93	4.26	0.87	0.69	0.793103
A93	0	1	76	3	3	2	126	86	1	10.8	9.36	2	58	5.1	2	2	0.077	133.6	12.1	12.76	152.4	6.9	1.17	2.44	2.22	4.24	1.19	0.8	0.672269
A94	0	1	82	3	3	1	147	76	2	5.7	5.3	2	61	4.6	1	2	0.844	531.5	13.8	15.82	184.7	2.88
A95	0	1	66	1	3	1	167	106	2	5.8	4.95	2	67	4	1	2			27.8	11.58	121.3		1.08	2.26	1.46	4.03	1.11	0.64	0.576577
A96	0	1	68	1	1	1	133	83	1	6.5	6.23	1	60	4.2	1	2	0.001	65.2	0.56		76.7		1.43	1.83	0.95	3.73	1.27	0.45	0.354331
A97	0	1	80	3	3	1	125	81	2	5.7	4.9	1	53	3.5	1	1	0.025	369.1			268.9	4.8	0.68	2.28	1.46	3.8	0.79	0.67	0.848101
A98	0	1	85	1	3	2	129	80	2	6.5	5.83	1		6	2	2			1.97	13.03	100.7		1.38	4.5	1.19	6.87	1.17	0.98	0.837607
A99	0	1	80	1	3	1	120	80	2	6.1	4.79	1		6	2	2	0.004	52.2	2.13	12.58	113.7	3.53	1.06	1.18	1.25	2.84	1	0.33	0.33
A100	0	1	77	3	3	2	149	90	1	7.8	7.74	2	62	4.2	1	2	0.003	68.9	1.88	10.99	58.4	18.56	0.96	2.9	2.19	4.56	0.96	1.07	1.11458
A101	0	1	53	3	3	1	104	74	2	5.9	5.62	2	46	3.3	1	1	0.006	24.4	59.2		93.4		0.97	4.23	1.47	5.39	0.9	1.13	1.25556
A102	0	1	89	2	3	1	136	63	1	6.9	13.17	2	66	6.6	2	2	0.015	137.8	191	7.61	112.4	2.51	1.21	2.03	0.82	3.24	0.87	0.59	0.678161
A103	0	1	49	1	1	2	138	95	2	6.2	4.33	2	58	4	1	2		10	13.53		68.9	1.77	0.86	2.54	1.41	3.81	0.82	0.7	0.853659
A104	0	1	87	3	3	1	138	87	2		4.29	1	42	5.1	2	2	0.513	1060.3	0.1	25.62	191.7		1.42	3.37	0.86	5.28	1.16	0.81	0.698276
A105	0	1	79	3	3	1	176	75	2	5.3	5.06	1		2	1	1	0.012	38.8	1.2	14.25	127.2		1.57	1.8	0.96	3.66	1.24	0.49	0.395161
A106	0	1	65	1	1	1	181	101	2	7.6	11.52	1	68	6.5	2	2	0.002	13.1	45.2		75.6	2.37	1.4	3.38	1.2	5.18	1.15	0.89	0.773913
A107	0	1	72	3	3	1	157	96	2	5.5	4.42	2	70	4.2	1	2	0.042	264.2			259.3		1.1	3.14	1.84	4.65	1.06	0.76	0.716981
A108	0	1	67	3	3	1	165	101	2	5.5	4.5	2		3.6	1	1	0.001	18.8			118.5		1.04	4.11	1.56	5.25	1.04	0.9	0.865385
A109	0	1	62	1	3	1	168	116	2	5.3	4.48	2	64	5.7	2	2			0	15.77			0.85	2.8	1.05	3.8	0.92	0.74	0.804348
A110	0	1	80	2	3	2	159	73	2	5.8	5.21	1	47	3.5	1	1	0.005	121.7	4.1	14.08	112.5		1.47	2.67	1.31	4.44	1.31	0.75	0.572519
A111	0	1	78	3	3	1	166	87	2		6.66	2	62	2.6	1	1					136.4	1	0.94	3.16	4.45	5.44	1.09	0.98	0.899083
A112	0	1	77	3	3	1	150	90	2	5.6	4.47	2	68	4.4	1	2			0	11.16	68.9	2.16	1.05	2.18	0.91	3.67	0.84	0.59	0.702381
A113	0	1	90	3	3	2	90	63	2	6.2	5.23	2	65	4.9	1	2	0.05	246.4	205.6	20.23	97.4	2.83	1.48	4.33	1.27	5.56	1.16	1.03	0.887931
A114	0	1	75	3	3	1	141	68	2	6	5.26	2	68	3.7	1	1	0.012	38.3			148.4	1.47	1.23	1.94	1.15	3.66	1.17	0.54	0.461538
A115	0	1	65	1	3	2	101	57	2	5	4.87	2	53	4.4	1	2	0.019	21.7	0	10.73	75.1	1.73	1.06	2.58	0.71	3.46	0.96	0.7	0.729167
A116	0	1	78	2	3	1	125	69	2	6.3	7.87	2	65	4.3	1	2	0.029	82.5	119.1		110.4	2.74	1.33	1.7	0.79	3.31	1.02	0.5	0.490196
A117	0	1	56	1	3	2	125	87	2	6	4.41	2	72	3	1	1	0.003	10	76.8	10.4	76.8	0.26	1.37	2.98	0.79	4.25	1.17	0.66	0.564103
A118	0	1	89	3	3	2	140	80	2	5.5	5.01	2	62	1.5	1	1	0.291	77.6	82.7		86.4		1.43	2.8	0.84	4.57	1.09	0.79	0.724771
A119	0	1	70	2	3	2	128	63	2	5.5	3.65	1	37	4.2	1	2	0.311	1601.2	2.99	11.26	80.2	5.24	1.07	4.5	1.26	6.59	0.97	1.16	1.19588
A120	0	1	76	1	3	2	150	83	2	6.5	5.48	2	64	5	2	2			182.24		79.7		0.99	5.23	1.58	6.94	0.97	1.41	1.45361
A121	0	1	78	2	3	1	143	61	2	5.4	4.91	1	61	4.7	1	2	0.023	299.7	31.6		593.6		0.6	1.66	1.6	2.87	0.66	0.65	0.984848
A122	0	1	79	3	3	1	152	85	1	9.1	11.64	2	62	2.3	1	1	0.002	13.6			132.6	0.73	1.22	3.09	2.48	4.87	1.11	1	0.900901
A123	0	1	39	2	3	1	135	82	2	5.6	4.83	2	62	2.8	1	1	0.002	10.5	0.98	13.76	80.9	0.57	1.37	3.76	1.91	5.81	1.25	1.04	0.832
A124	0	1	68	1	1	1	149	84	2		4.36	2		4.2	1	2	0.006	39.1	47.18		66.5	1.45	0.86	2.34	0.93	3.35	0.82	0.67	0.817073
A125	0	2	83	3	3	1	160	79	2	5	5.12	2	38	2.6	1	1	0.587	5000	0	12.96	97.7		1.55	1.82	1.04	3.68	1.23	0.48	0.390244
A126	0	1	78	3	3	1	118	67	2		11.53	1	57	6.9	2	2	0.008	51.4			116.6	7.66	1.09	3.17	3.9	5.14	1.16	0.96	0.827586
A127	0	1	69	3	3	2	157	89	2	6	8.35	2	66	3.4	1	1		60.3	50.56	8.66	133.5		1.21	2.81	1.46	4.79	1.05	0.8	0.761905
A128	0	2	84	3	3	1	109	64	2	5.9	4.84	1	63	10.3	3	3	0.022	142.8	87.44	19.76	125.4	18.33	0.94	2.84	1.48	4.65	0.99	0.88	0.888889
A129	0	1	73	3	3	1	117	62	2		4.59	2		5.9	2	2					119.7	5.98	0.83	1.82	1.23	3.31	0.59	0.66	1.11864
A130	0	1	62	3	3	1	128	79	2	5.4	5.47	2	65	4.3	1	2	0.003	17.2	0.41	12.24	81.7	0.73	0.93	2.59	1.12	4.18	0.85	0.76	0.894118
A131	0	1	62	1	3	1	139	96	2	5.4	4.84	2	63	6.5	2	2	0.012	22.2	0.1	13.7	98.8	2.77	0.98	2.1	3.99	5.04	1.1	0.75	0.681818
A132	0	1	78	3	3	1	130	90	2	4.8	5.42	1	53	6.2	2	2	0.012	480.6	2.62	19.61	74.3	8.98	1.25	1.38	0.51	2.84	0.79	0.34	0.43038
A133	0	1	77	3	3	1	133	69	2	5.5	4.86	1	36	4.8	1	2	0.013	265.5	0.1		92.2
A134	0	1	84	1	3	1	114	82	2	5.8	5.84	2	64	4.3	1	2	0.002	25.2	4.28	21.67	75.3		0.79	2.6	2.03	4.01	1.03	0.75	0.728155
A135	0	1	71	1	3	2	134	89	2		4.95	2	62	4.7	1	2	0.024	97	3.88		100.1	2.18	0.93	1.95	1.06	3.37	0.85	0.57	0.670588
A136	0	1	75	3	3	2	116	76	2		3.88	2	63	3.6	1	1			69.69		77	0.63	1.25	3.51	1.36	5.57	1.02	1.03	1.0098
A137	0	1	74	2	3	1	136	77	2		4.14	1	64	2.8	1	1		144.6			139.6	1.47	1.15	1.53	0.71	2.97	1.05	0.46	0.438095
A138	0	1	70	3	3	2	137	90	2		5.83	1	44	3.3	1	1	0.008	444.9	11.36		126.4	1.36	1.1	1.52	1.15	3.06	1.15	0.48	0.417391
A139	0	1	63	1	3	2	128	77	2	7.2	7.72	2	70	3.6	1	1	0.001	18.4			67.9		1.06	3.28	1.88	4.84	1.06	0.94	0.886792
A140	0	2	86	3	3	1	135	95	2	5.8	5.21	1	66	7.6	3	3	0.006	96.1	1.16	11.42	83.6	6.27	1.2	2.9	1.96	4.92	1.14	0.97	0.850877
A141	0	1	75	2	3	2	119	85	2	5.8	6.46	2		3.7	1	1	0.004	63.8	178.77		105.5		1.1	3.13	2.78	5.03	1.1	1.01	0.918182
A142	0	1	71	2	3	2	134	85	2	5.9	3.87	1	45	4.2	1	2			0.72	8.68	99.9	1.57	1.42	1.88	1.03	3.66	1.23	0.55	0.447154
A143	0	1	89	2	3	2	111	69	2	5.7	5.05	1	62	4.2	1	2	0.003	71.8	0	14.65	90.7	2.11	1.15	3.74	0.71	4.82	0.99	0.97	0.979798
A144	0	1	79	3	3	1	120	64	1	5.9	6.01	1		3.8	1	1	0.799	473.6	42.26		87.8	2.13
A145	0	1	75	3	3	1	156	83	2		8.5	2	63	2.6	1	1	0.056	111.8			85.6	1.95	1.07	3.19	1.74	5.24	1.05	0.97	0.92381
A146	0	1	76	1	3	1	116	82	2		5.91	1	40	5.7	2	2	0.007	87.3	9.38		73.9		0.98	4.08	1.51	6.24	0.82	1.19	1.45122
A147	0	2	69	3	3	1	142	89	2	5.7	5.23	2	58	5.5	2	2	0.002	10	8.14		79.3	8.23	0.76	2.46	1.35	3.89	0.77	0.75	0.974026
A148	0	1	71	3	3	1	127	78	2		5.87	1	61	5	2	2	0.022	39	1.84		141	8.27	1.48	1.98	0.91	3.63	1.17	0.62	0.529915
A149	0	2	87	3	3	1	135	62	2		6.59	2	65	3.8	1	1	0.005	37.1	3.21		66.6	12.71	1.94	1.51	1.19	3.55	1.37	0.47	0.343066
A150	0	1	73	1	3	1	133	83	2		5.16	2	49	4.3	1	2	21.446	603.9	70.63		67.5	0.91	0.94	2.06	2.14	3.54	0.72	0.74	1.02778
A151	0	1	69	3	3	1	178	80	2	5.6	3.97	1	66	3.9	1	1	0.005	59.2	0	9.97	67.2		0.89	1.95	0.97	2.88	0.82	0.56	0.682927
A152	0	1	69	2	3	1	128	91	2		4.95	2	64	4.5	1	2	0.007				83.6		0.91	2.63	1.28	4.08	0.8	0.9	1.125
A153	0	1	70	3	3	1	172	86	2	6.1	4.33	1	60	3.1	1	1	0.006	54.7	0	18.55	89	0.47	1.39	2.4	1.2	4.13	1.16	0.71	0.612069
A154	0	1	76	1	3	2	125	75	2	6.1	5.9	2	63	6.1	2	2	0.003	17.4	7.66		105.6	2.66	1.14	3.45	0.97	5.19	0.93	1.02	1.09677
A155	0	1	77	1	1	2	125	70	2		4.81	2	60	2.4	1	1			44.91		131.8	1.44	0.86	2.5	1.09	3.85	0.72	0.86	1.19444
A156	0	1	88	3	3	2	134	87	2	5.2	4.43	1	64	4.8	1	2	0.03	59.8	142.16		57.3	3.1	1.16	1.95	0.77	3.41	0.95	0.62	0.652632
A157	0	2	89	3	3	1	150	100	2	5.6	5.81	1	46	2.8	1	1	0.08	429.5	0	25.2	178.8		1.59	2.52	1.33	4.49	1.27	0.8	0.629921
A158	0	2	92	3	3	2	126	83	2	5.9	6.31	1	30	3.9	1	1	19.02	5000	24.21	14.05	305.3	20	2.6	4.27	0.9	7.52	1.63	1.15	0.705521
A159	0	1	83	3	3	1	142	89	2	6	5.8	2	62	5.4	2	2	0.005	173.8	141	8.63	71.7	2.69	0.84	1.91	0.76	3.07	0.59	0.6	1.01695
A160	0	1	71	3	3	2	177	88	2	5.4	4.56	2	43	4	1	2	0.024	241.6	48.45	9.78	114.6		1.02	2.33	0.95	4.14	0.97	0.77	0.793814
A161	0	2	86	3	3	1	121	83	2	5.3	4.6	2	64	3.2	1	1	0.004	154.4	74.6	11.97	72.2	5.72	0.9	2.24	0.97	3.59	0.81	0.7	0.864198
A162	0	1	85	3	3	1	149	84	2	5.5	4.72	1	60	3.9	1	1	0.021	42.1	44.69	14.22	103		1.45	1.34	1.17	2.92	1.06	0.47	0.443396
A163	0	1	85	2	3	1	127	83	2		4.67	2	66	3.8	1	1	0.014	1780.3	10.66		68	2.92	1.17	2.15	0.75	3.72	0.86	0.64	0.744186
A164	0	1	75	1	3	2	91	65	2	5.6	4.94	2	65	2.8	1	1	0.004	22.1	3.53	11.67	52.1	1.49	1.3	2.29	0.79	3.89	1.02	0.64	0.627451
A165	0	1	83	3	3	1	145	82	2		4.12	2	62	2.8	1	1	0.027	119.6	4.83		124.1		1.42	2.22	0.73	3.96	1.08	0.66	0.611111
A166	0	1	82	3	3	1	110	70	2	5.7	4.79	2	67	3	1	1	0.023	227.7	30.03		103.1	11.38	1.24	2.77	1.09	4.47	0.95	0.82	0.863158
A167	0	1	74	3	3	1	129	75	1	5.4	4.42	1	32	1.5	1	1	0.024	3639.8	37	15.76	136.7	7.95	0.81	1.03	0.32	2.08	0.76	0.34	0.447368
A168	0	1	76	2	1	1	123	73	2		7.76	1	67	6.6	2	2	0.162	31.8	5.3		380.9	17.16	0.84	0.75	0.85	2.54	0.94	0.23	0.244681
A169	0	1	78	3	3	2	165	65	2	6.7	18.56	2	52	3.2	1	1	0.069	108.3	67.48		81.4	7.27	1.2	2.38	0.88	4.05	1.01	0.73	0.722772
A170	0	1	72	2	3	1	106	62	2	5.7	6.21	1	62	3.5	1	1	0.002	18.3	6.82	10.61	89.5	0.76	1.34	1.44	1.08	3.51	1.24	0.44	0.354839
A171	0	1	71	3	3	1	137	78	2	5.9	4.24	2	61	3.5	1	1	0.003	10	0.6	13.65	94.6	0.66	1.17	2.01	1.19	3.95	1.12	0.59	0.526786
A172	0	1	79	3	3	1	125	83	2	5.2	4.36	2		6.6	2	2	0.019	90.1	28.18	17.29	134.8	4.52	1.07	2.93	1.38	5.05	0.98	0.8	0.816327
A173	0	1	64	3	3	2	123	88	2	10.1	8.91	1	48	3.9	1	1	12.319	807.4	79.49	9.91	77.2	3.02	0.72	2.31	1.08	3.89	0.62	0.74	1.19355
A174	0	1	69	2	3	1	146	95	2	6	4.22	1	65	7.7	3	3	0.006	10	6.56	11.72	108.2	2.08	0.87	3.18	1.52	5.2	0.87	0.94	1.08046
A175	0	1	58	1	3	1	116	79	2	5.5	3.98	1	61	3.8	1	1	0.001	10	1.11	10.02	120.4	2.23	1.11	2.65	0.95	4.78	1.03	0.67	0.650485
A176	0	2	63	3	3	2	110	74	2	5.6	4.42	2	59	4.3	1	2	0.003	44.8	1.86	6.88	51	1.25	1.05	1.97	2.07	3.96	1.14	0.62	0.54386
A177	0	1	66	3	3	2	139	94	2		4.38	1	63	4.5	1	2	0.002	16.8	17.83		78.2	9.25	1.5	3.13	1.07	5.7	1.24	0.73	0.58871
A178	0	1	74	1	3	2	109	70	2		4.89	1	63	7.7	3	3	0.001	35.4			113.7	4.64	0.79	1.87	2.44	3.62	0.94	0.6	0.638298
A179	0	1	87	3	3	2	122	74	2		4.51	1	40	5.2	2	2	20.82	387.6	22.51		281.7	20	0.59	1.17	0.97	2.38	0.66	0.47	0.712121
A180	0	1	78	3	3	2	91	75	2	5.5	7.73	1	24	5.3	2	2	0.151	4065.1	16.31	20.23	137.9	2.28	0.98	1.41	0.7	2.96	0.6	0.42	0.7
A181	0	1	80	3	3	2	116	76	2		8.02	2	61	3.6	1	1	0.001	10	13.41		86.9	3.75	0.96	2.93	0.95	4.87	0.82	0.9	1.09756
A182	0	1	73	1	1	2	99	58	2		4.56	2	69	3.3	1	1	0.022	102	18.14		71.6		0.71	1.75	1.6	3.32	0.72	0.63	0.875
A183	0	1	87	3	3	2	113	64	2	5.8	4.13	2	62	1.9	1	1			0	9.9	83.9	1.43	1.08	3.54	1.14	5.65	0.96	1	1.04167
A184	0	1	72	2	3	2	141	79	2	5.7	4.06	1	62	5.1	2	2	0.002	13.3	3.23	15.06	63.1	1.3	0.72	3.99	7.1	9.05	0.78	1	1.28205
A185	0	1	82	3	3	2	152	87	2	6	4.62	1	44	3.4	1	1	0.112	223.8	111.4		80.2	5.75
A186	0	1	63	3	3	1	136	76	2	5.4	2.51	1	50	4.1	1	2	5.603	571.3	6.32	18.53	141.1		0.62	2.51	6.28	5.92	0.7	0.56	0.8
A187	0	2	55	3	3	1	130	95	1	7.8	7.79	2	65	6.3	2	2		17.6	3.65	7.8	51.1	0.35	0.92	3.32	10.25	10.71	1.13	0.86	0.761062
A188	0	1	81	1	3	2	122	64	2	5	4.72	1		3	1	1		232.5	0	16.18	122.7	3.75	1.21	1.61	1.29	3.68	0.89	0.55	0.617978
A189	0	1	67	1	3	1	139	90	2	5.6	3.8	1	62	3.9	1	1	0.002	25.8	0	12.67	96.8	2.45	1.19	3.56	1.19	5.7	1.12	0.95	0.848214
A190	0	1	69	2	3	1	167	100	2	6.1	4.83	1	68	4.1	1	2	0.005	38.8	0	11.99	92.6	0.57	1.25	4.9	1.16	7.89	1.07	1.28	1.19626
A191	0	1	68	2	3	1	109	68	2	6.2	4.61	1	61	7.9	3	3	0.01	81.8	0	11.42	161.8	20	0.98	2.04	0.94	3.63	0.72	0.65	0.902778
A192	0	1	81	3	3	2	125	86	2		6.19	2	69	6.9	2	2		57.3			118		1.03	3.74	1.06	5.82	0.83	0.96	1.15663
A193	0	1	84	3	3	1	117	67	2	5.7	5.43	1	48	3.4	1	1	0.023	105.9			138.5		1.03	1.49	1.21	3.17	0.94	0.47	0.5
A194	0	1	79	2	1	1	152	80	1	6.6	4.08	1	33	5.8	2	2	0.021	272.4	0	16.95	138.7	20	0.96	2.55	1.45	4.41	0.82	0.81	0.987805
A195	0	1	56岁	1	3	1	147	92	2	6	6.26	2	60	1	1	1	0.001	42.4	0	11.78	67.1	0.55	1.19	2.71	0.77	4.46	1.04	0.72	0.692308
A196	0	1	67	2	3	1	117	86	2	5.9	4.32	1	67	4.2	1	2	0.001	49.3	0	12.66	82.5	1.66	1.11	2.38	0.97	4.14	0.9	0.62	0.688889
A197	0	1	77	3	3	1	130	72	1		10.99	2	61	4	1	2	0.01	17.6	8.94		45.1	3.5	1.84	1.85	0.87	4.03	1.47	0.58	0.394558
A198	0	1	74	1	3	2	153	92	2	6.8	5.4	2	66	4.6	1	2	0.006	31.4	1.81	20.29	179.6		0.93	2.47	1.63	4.42	0.86	0.78	0.906977
A199	0	1	73	3	3	2	128	65	2		2.79	2	60	4.6	1	2	0.813	371.3	32.81		103.2		0.76	1.47	0.61	2.75	0.54	0.54	1
A200	0	1	85	1	3	1	146	84	2	5.5	5.14	2	56	4.3	1	2	0.014	149.5		11.99	94.4		0.94	2.29	0.98	4.02	0.79	0.79	1
A201	0	2	83	3	3	1	167	80	1		9.85	1		3.9	1	1	0.017	273.1	10.08	21.35	212.5		1.44	2.48	0.67	4.74	1.03	0.66	0.640777
A202	0	1	71	1	3	2	113	70	2	5.9	4.13	2	35	3.5	1	1	0.125	556.8	5.49	16.94	73.1	1.06	1.08	2.48	1.85	4.67	1	0.8	0.8
A203	0	1	63	3	3	2	114	79	2	5.8	5.06	2	65	8.1	3	3	0.007	26.1	25.27	14.97	59.6		1.28	2.35	1.47	5.13	1.09	0.72	0.66055
A204	0	1	68	1	1	1	152	84	2	7	5.74	2	63	5.6	2	2				10.03	135.8	0.97	0.96	3.14	2.13	5.4	0.98	0.8	0.816327
A205	0	1	72	3	3	1	150	85	2	6.2	6.17	2	65	7.2	3	3			99.01	8.04	71	3	0.95	4.53	2.14	7.45	0.89	1.37	1.53933
A206	0	1	82	3	3	2	137	73	2			2	69	3.7	1	1
A207	0	1	60	3	3	1	90	56	1		5.74	2		4.3	1	2					70.6	1.55
A208	0	1	80	2	3	2	138	89	2	5.3	7.71	1	74	3.5	1	1	0.003	144.5	38.15		62.3	3	0.94	1.65	1.02	3.31	0.75	0.65	0.866667
A209	0	1	79	3	3	2	100	81	2	6.1	3.44	2	65	3.4	1	1	0.013	163.3	211.61		271.4	3	0.84	2.13	1.72	3.93	0.56	0.95	1.69643
A210	0	1	78	2	3	2	133	65	1		11.27	2	64	4.7	1	2	0.021	152.2	12.35		33	3	1.39	2.1	1.9	4.52	1.17	0.73	0.623932
A211	0	2	76	3	3	2	100	76	1	7.6	7.51	2	52	5.2	2	2					91.4	3	1.08	3.57	2.28	6.15	1.02	1.03	1.0098
A212	0	1	58	1	3	1	143	81	2	5.6	3.98	2	63	6.1	2	2				8.93			3.85	1.73	1.76	5.13	0.82	0.97	1.18293
A213	0	1	71	3	3	2	126	63	2	6	5.11	1	64	6.8	2	2	0.005	19	158.7		87.9	3	0.78	1.8	2.16	3.6	0.69	0.62	0.898551
A214	0	2	87	3	3	1	120	80	2		5.14	2	56	4	1	2					69.1		1.71	5.24	1.3	8.69	1.36	1.43	1.05147
A215	0	2	80	3	3	2	147	87	2	6.5	5.38	1	32	2.2	1	1	0.041	1229.2	54.08	20.85	133.1	1.9	1.03	2.54	0.99	4.41	0.96	0.79	0.822917
A216	0	1	80	3	3	1	95	55	2	6.5	8.79	1	38	4.1	1	2	5.144	893.6	34.07	12.44	106.1		1.31	2.92	1.99	5.5	1.01	0.91	0.90099
A217	0	1	72	1	3	2	120	80	2		5.34	2	64	8	3	3	0.003				119.1		0.95	3.56	1.14	5.67	0.97	1.14	1.17526
A218	0	1	67	3	3	2	114	79	2	6.1	5.38	2	46	7.8	3	3	0.032	129.3	6.12	22.22	108.9	2.17	0.76	2	2.11	3.77	0.86	0.71	0.825581
A219	0	2	77	3	3	2	123	80	2	5.5	4.07	1	64	2.5	1	1	0.003	71.4			47.6		1.51	3.02	0.88	5.43	1.19	0.84	0.705882
A220	0	1	73	3	3	1	120	100	2	5.3	3.91	2	59	8.1	3	3				18.89	85		1.11	2.12	0.78	3.86	0.85	0.68	0.8
A221	0	1	58	1	1	1	110	59	2	6.2	5.49	1	62	4	1	2	0.001	10	9	11.49	78.4	0.53	1.04	3.3	5.67	7.19	1.28	1.35	1.05469
A222	0	1	59	3	3	1	121	65	2	6.2	5.57	2	63	4.7	1	2	0.004	18.1			125.9		0.86	3.72	1.63	5.5	0.65	1.24	1.90769
A223	0	1	61	3	3	2	130	67	1	6.6	9.28	2	60	3.3	1	1	0.019	36.8	118.5		390.3	3	0.4	5.22	5.13	10.35	0.32	2.3	7.1875
A224	0	1	84	3	3	2	128	80	2		5.54	2		3	1	1			32.5		101.8
A225	0	2	82	3	3	1	171	96	2		10.99	2	66	3.1	1	1					33.7		0.75	1.05	1.69	2.39	0.78	0.5	0.641026
A226	0	1	63	1	3	1	129	85	2		5.32	2	62	6.1	2	2			59.39		82.7	1.59	1.06	3.2	1.32	4.97	1.04	0.89	0.855769
A227	0	1	63	1	3	1	170	85	2	5.9	5.43	2	64	3.9	1	1	0.011	152			86.2	0.64	1.15	4.43	1.52	6.83	1.03	1.25	1.21359
A228	0	1	80	2	3	1	165	101	2		3.06	1		4.9	1	2	0.065	350.9	39.67		90.4	2.07	0.79	1.65	1.23	3.06	0.64	0.53	0.828125
A229	0	1	79	1	1	2	129	78	2	6.1	4.52	2	62	2.5	1	1	0.004	14.8	4.55	8.77	89.3	0.43	0.77	2.76	1.94	4.3	0.8	0.92	1.15
A230	0	1	87	1	3	2	113	71	2	6	4.04	2	40	6.6	2	2	28.917	2500	387.46	17.19	458.4		1.47	0.8	1.54	3.32	0.8	0.46	0.575
A231	0	1	70	3	3	2	126	76	2	6.1	6.57	2	52	7.3	3	3	0.004	43.6	13.9	11.32	96.6	2.93	1.31	1.47	0.82	3.49	0.95	0.48	0.505263
A232	0	1	69	1	3	1	140	85	2	6	6.14	2	66	4.1	1	2			18.28	14	83.9		1.11	3.54	1.24	6	1.02	1.23	1.20588
A233	0	1	89	3	3	2	120	94	2	5.6	3.95	1	44	6.6	2	2	0.018	195.5	0.56	15.43	90.5	3	1.69	1.35	0.73	3.63	1.27	0.49	0.385827
A234	0	1	70	1	3	1	132	83	1	7.3	7.39	1	63	2.5	1	1	50	71.3	3.99	7.95	61.6	0.22	1.67	2.41	1.33	5.16	1.33	0.83	0.62406
A235	0	2	70	3	3	1	148	88	1	6.4	7.81	2	68	5.4	2	2					126.8		0.58	3.98	2.4	6.49	0.77	0.8	1.03896
A236	0	2	85	3	3	1	141	92	1	6.8	6.8	2	71	3	1	1	0.017		128.39	7.28	77.4	1.71	1.1	2.67	2.64	5.31	0.84	1.05	1.25
A237	0	1	83	3	3	1	145	87	2	5.7	4.77	2	61	5.1	2	2	0.003	16.8	0.93	10.85	92.9	2.45	1.68	3.38	1.28	6.57	1.4	0.96	0.685714
A238	0	1	79	3	3	1	146	106	1	6.3	10.23	1	44	6	2	2	7.327	386.6	85.53	12.47	71	3	0.86	0.95	0.84	2.3	0.65	0.42	0.646154
A239	0	1	81	1	3	2	126	68	2	5.6	4.07	2	63	8.6	3	3	0.004	64.4	1.27	12.7	70.2	3	1.43	3.06	0.91	5.63	1.09	0.99	0.908257
A240	0	1	73	1	3	1	129	74	2		5.94	1	42	3.8	1	1	0.007	492			90.6	2.87
A241	0	1	73	2	3	2	102	71	1	5.7	8.27	1	62	5.2	2	2	0.001	10			99.3		0.53	1.26	4.06	3.37	0.77	0.53	0.688312
A242	0	1	92	2	2	1	141	89	2	5.9	4.24	2	66	3.1	1	1	0.011	44.6	75.4	13.11	91.7	2.49	0.82	2.23	1.65	4.2	0.7	0.81	1.15714
A243	0	1	89	2	3	1	158	80	1	8.7	15.28	1	35	5.6	2	2	1.646	1454.8		10.72	79.6	1.2	1.43	2.25	0.9	4.66	1.35	0.78	0.577778
A244	0	1	90	3	3	1	169	84	2	6.1	5.9	2	64	2.5	1	1	1.133	81.7	261.95	11.78			1.11	2.53	2.13	5.09	1.02	0.89	0.872549
A245	0	1	74	3	3	1	126	76	2	5.9	4.37	2	67	5.5	2	2				12.31	97.5	2.68	1.13	2.52	1.92	4.85	1.09	0.82	0.752294
A246	0	1	71	3	3	1	128	88	2	5.7	4.14	2	62	8.05	3	3	0.01	81.1	4.03	24.83	143.9	>3.00	0.73	1.8	2.17	3.82	0.71	0.94	1.32394
A247	0	1	75	1	3	1	140	75	2	6.4	4.05	2	71	3.6	1	1				13.46	93.3		1.13	2.51	0.75	4.5	0.89	0.82	0.921348
A248	0	1	91	2	3	2	103	63	2		6.23	2	66	4	1	2	0.019	79.1	98.67		44.5	2.07	0.88	1.81	1.26	3.53	0.79	0.7	0.886076
A249	0	1	58	2	3	1	134	70	2	5.5	4.87	2	65	5.2	2	2			15.3	10.33	103	1.96	1.22	2.04	1.73	4.31	1.22	0.73	0.598361
A250	0	1	49	1	3	2	131	58	2	6.2	5.35	2	52	4.1	1	2	0.013	824.1		10.8	89.8	1.51	0.66	1.42	1.84	2.97	0.71	0.55	0.774648
A251	0	1	63	3	3	2	122	74	2		5.1	2	64	5.6	2	2					97.2		1.82	2.66	0.91	5.49	1.44	0.87	0.604167
A252	0	1	56	3	3	1	128	79	1	7.9	5.96	1	45	4.8	1	2	0.009	11.3		12.26	74.2	0.36	0.76	1.16	2.6	2.92	0.77	0.5	0.649351
A253	0	1	66	2	3	2	106	76	2		3.86	2	66	3.5	1	1	0.001	57.4	0.27	12.43	73.5	0.35	0.98	1.64	0.93	3.35	0.91	0.58	0.637363
A254	0	1	69	1	1	1	140	79	2			2	54	5.4	2	2	0.007	360.1	15.05		128.1		2.22	1.89	0.96	4.77	1.55	0.7	0.451613
A255	0	1	68	3	3	2	120	82	2	5.7	4.54	2	63	4	1	2	0.003	51.8	3.5	11.86	67.3	2.52	1.12	0.57	1.32	2.12	1.03	0.29	0.281553
A256	0	1	75	1	3	2	126	82	2		4.67	2	68	3.3	1	1	0.003	18.3	59.12		65.5	1.01	1.09	1.93	0.95	3.79	0.87	0.65	0.747126
A257	0	2	70	3	3	1	133	91	2	6.6	5.43	1	64	5.9	2	2	0.007	29.7	4.4	11.42	51.9	2.05	1.14	1.95	1.19	3.98	1.13	0.66	0.584071
A258	0	2	87	3	3	2	131	71	2		5.47	2		2.9	1	1	0.439	647.8	215		57.6	3
A259	0	2	40	3	3	2	115	58	2	5.4	5.08	2	63	6.8	2	2	0.002	64.4	87.6	5.91	46.2		2.28	1.85	0.66	4.87	1.47	0.62	0.421769
A260	0	1	83	3	3	1	142	93	1	6.1		1	56	5	2	2	0.081	254.1	141.06				1.07	0.88	1.09	2.4	0.63	0.44	0.698413
A261	0	1	75	1	3	1	119	81	2	5.5	3.9	2	69	4.3	1	2	0.002	12.7	6.59		72.5	1.74	1.62	1.24	0.88	3.37	1.31	0.45	0.343511
A262	0	1	78	3	3	2	85	52	2	5.3	7.25	2	63	3.4	1	1	0.007		26.72	5.05		0.99	0.69	0.97	1.25	2.59	0.45	0.44	0.977778
A263	0	2	69	3	3	1	162	91	2		6.19	1	60	3.6	1	1		10		6.45	32	3	1.98	2.47	0.83	5.55	1.51	0.84	0.556291
A264	0	1	74	2	3	1	150	88	2	6.2	4.74	1	63	5	2	2	0.002	55.6		13.06	55.7	2.99	1.4	1.73	1.22	4	1.23	0.6	0.487805
A265	0	1	60	1	2	1	143	91	2		4.83	2	73	3.1	1	1	0.004	45.7		11.89	78.8	1.36	1.08	2.99	2.57	5.54	1.18	1.09	0.923729
A266	0	1	77	3	3	1	121	87	2	5.6	8.48	2	63	5.8	2	2	0.007	11.9	3.04		77.8	3	0.6	1.45	1.6	2.84	0.6	0.5	0.833333
A267	0	1	81	3	3	1	160	90	2	6.4	5.82	1	65	4.6	1	2	0.007	23.1		15.7	106.7		1.25	2.69	0.58	5.28	1.04	0.86	0.826923
A268	0	1	69	3	3	1	146	84	1	8.6	7.87	1	62	3.2	1	1	0.003	38.1			81.3		1.27	2.51	1.58	5.12	1.13	0.84	0.743363
A269	0	1	67	3	3	1	123	81	2		4.75	1		5.4	2	2	0.005	18.4			61.6	1.36	1.15	2.65	1.06	4.92	0.98	0.94	0.959184
A270	0	2	76	3	3	2	117	87	2	5.3	4.15	1	64	3.5	1	1	0.106	171.6	3.14		46.8		1.33	1.24	0.64	3.44	0.79	0.42	0.531646
A271	0	2	78	3	3	1	205	110	2	6	5.8	2	63	6	2	2	0.005	122.6		9.86	44.7		1.3	3.48	1.58	6.55	1.5	1.24	0.826667
A272	0	1	61	3	3	2	160	80	1	6.3	17.04	2	66	5.3	2	2			297			3	0.75	0.8	1.82	2.5	0.56	0.36	0.642857
A273	0	1	84	3	3	2	147	75	2	5.9	4.49	1	46	3.3	1	1	0.016	1542.4	12.3	18.56	95.1	1.03	0.77	1.42	1.07	2.94	0.83	0.55	0.662651
A274	0	1	62	1	3	1	149	111	2	5.8	3.63	1	64	5.7	2	2	0.006	15.4	0.94	52.66	71.1	1.75	1.33	2.26	1.39	4.66	1.28	0.82	0.640625
A275	0	1	72	1	3	1	166	75	2	5.9	6.6	1	64	5	2	2	0.375	35.6	105	11.76	60	3.00	1.01	2.04	0.93	4	0.77	0.76	0.987013
A276	0	1	68	3	3	1	118	78	2		5.55	2	62	4.1	1	2
A277	0	2	84	3	3	2	123	76	2		3.71	2	65	3.4	1	1					150		0.78	2.47	1.19	4.3	0.57	0.96	1.68421
A278	0	1	69	3	3	2	114	68	2		3.67	2		5.9	2	2					66.6		1.06	2.18	1.42	4.38	0.96	0.81	0.84375
A279	0	1	73	3	3	1	171	113	1	6.9	5.49	1	30	8.7	3	3	0.027	544.5	9.05			3	1.14	2.89	0.75	4.99	0.79	0.99	1.25316
A280	0	1	78	1	3	1	152	94	2	6.2	3.21	1	52	6.8	2	2	0.061	497.8	1.41	19.81	111.9	3.00	1.16	2.57	1.23	4.85	0.96	0.89	0.927083
A281	0	1	78	3	3	1	199	141	2	5.3	8.06	1	66	6.3	2	2					93.8		1.24	2.89	0.84	5.09	1.06	1	0.943396
A282	0	1	74	3	3	1	105	76	1	6.9	9.47	1	63	6	2	2		10			67.7	1.52	1.18	1.97	1.82	4.37	1	0.99	0.99
A283	0	2	68	3	3	1	145	87	2	6.1	5.87	1	69	5.1	2	2					50.2		1.58	2.89	0.88	5.56	1.26	1	0.793651
A284	0	2	61	3	3	1	193	104	2		5.64	2	62	6.1	2	2				21.03	659.4		1.25	2.96	1.07	5.49	0.85	1	1.17647
A285	0	1	68	3	3	1	151	111	2	6.3	4.78	2	42	5.2	2	2					166.7	2.13	0.91	2.6	1.9	4.76	0.76	1.01	1.32895
A286	0	1	66	3	3	2	133	68	2		4.22	2		6.66	2	2					65.2	2.88	1.26	2.97	1.11	5.4	1.08	0.91	0.842593
A287	0	1	76	1	3	1	131	71	2	5.1	5.3	1	62	6.1	2	2	0.482	679		36.4	130	3.4	1.22	4.15	0.52	4.99	0.92	1.16	1.26087
A288	0	1	67	3	3	1	145	89	2	5.5	3.84	2	68	7.5	3	3				13.49	90.9	0.81	1.14	2.81	1.73	5.39	1.06	1.01	0.95283
A289	0	1	82	3	3	1	138	79	2		5.54	2	71	4.3	1	2		169		24.2	107		1.53	2.6	0.74	4.4	1.31	0.66	0.503817
A290	0	1	78	2	3	2	108	75	2	6.7	4.07	1	65	7.8	3	3	0.005			11.57	73.8	5.00	1.17	2.24	1.54	4.45	1.21	0.81	0.669421
A291	0	1	66	2	3	2	151	86	2	5.7	4.85	1	63	2.4	1	1	0.008	10		15.54	73	1.44	0.99	2.04	1.5	4.1	0.8	0.85	1.0625
A292	0	1	77	3	3	1	140	64	2		4.01	2	66	1.8	1	1		21.6			73.1	0.87	1.23	2.07	1.11	4.21	1.19	0.83	0.697479
A293	0	2	75	3	3	2	121	74	2	5.7	3.55	2	66	3.4	1	1	0.003	10	0.92	11.6	67.2	0.64	0.82	3.56	2	6.26	0.81	1.19	1.46914
A294	0	2	81	3	3	2	143	85	2			2	62	2.3	1	1	0.005	294.8			83.3	3.00
A295	0	1	64	1	1	2	132	92	2		4.69	2	65	4.7	1	2					69.1		1.13	1.72	1.85	3.93	1.11	0.71	0.63964
A296	0	2	80	3	3	2	124	71	2		6.72	2		4.1	1	2					70.3	0.56	1.45	2.37	0.94	4.94	1.17	0.83	0.709402
A297	0	1	67	1	3	2	132	75	2		4.3	2	66	4.3	1	2		35.4			114.8		1.15	2.53	1.04	4.59	1.07	0.84	0.785047
A298	0	1	82	2	3	2	166	99	2	5.9	3.62	1	55	4	1	2	17.448	746.5			78.6		1.27	0.93	0.88	2.85	0.69	0.43	0.623188
A299	0	1	83	3	3	1	126	72	1	5.9	4.26	1	63	0.7	1	1	0.002	32.9	0.39	12.49	132.5	0.7	1.13	1.84	0.8	3.47	0.91	0.64	0.703297
A300	0	1	75	2	3	2	120	65	2	5.3	4.35	1	50	5.4	2	2	0.015	309.4		14.77	78.2	2.63	1.95	1.11	0.79	3.62	1.36	0.43	0.316176
A301	0	1	60	1	3	1	160	112	2	5.9	4.84	2	62	5.1	2	2	0.004	116		13	87	1.12	0.82	2.73	1.27	4.36	0.91	0.98	1.07692
A302	0	1	77	3	3	1	142	82	2	5.6	5.23	1		5.9	2	2	0.011	87.6	82.51	20.3	162.8	2.26	1.07	1.44	0.67	3.14	0.75	0.52	0.693333
A303	0	1	65	3	3	1	140	88	2		4.27	2	63	4.1	1	2	0.005	18.3			112.8		1.13	2.03	0.85	3.95	0.89	0.64	0.719101
A304	0	1	74	1	1	1	126	74	1		3.61	2	64	7.5	3	3			10.23		81.4	1.46	1.35	2.79	1.42	4.95	1.05	0.91	0.866667
A305	0	1	81	3	3	2	144	71	2	5.4	4.51	2	63	5	2	2	0.068	234.6	142.02	11.39	96.4	3.00
A306	0	1	86	3	3	2	175	83	2		5.39	2	60	4.6	1	2		315.3			167.8	5.00
A307	0	1	78	1	3	2	123	84	2	6.2	4.08	2	63	3.5	1	1		34.7		1.48	90.7	0.95	0.91	1.26	0.69	2.81	0.9	0.46	0.511111
A308	0	1	73	1	3	1	113	56	2		3.51	2	67	3.1	1	1	0.007	76.3	56.06		222.3	1.22	0.53	1.01	1.86	2.36	0.72	0.48	0.666667
A309	0	1	75	3	3	1	143	88	2	5.8	3.34	1		3.3	1	1	6.056	4167.5	39.6	12.73	792		0.51	2.25	3	4.42	0.6	0.93	1.55
A310	0	2	82	3	3	2	122	66	2		5.92	2		2.4	1	1			3.36		85		0.96	1.85	1.49	4	1.01	0.67	0.663366
A311	0	1	54	3	3	1	143	89	2	6.1	4.78	2	64	6.7	2	2	0.03	138.7	51.25	10.17	83.5		1	1.96	1.42	3.82	1.03	0.78	0.757282
A312	0	1	89	1	3	2	116	81	2		4.82	2	66	2.8	1	1			23.86		66.4		1.22	2.81	0.78	5.13	0.91	0.9	0.989011
A313	0	1	69	1	3	1	136	93	2	5.6	4.4	1	67	7.5	3	3	0.041	131.3	28.7	15.03	112.5	5.00	1.28	2.57	0.68	4.85	1.05	0.87	0.828571
A314	0	1	63	2	3	1	135	106	1	9	6.23	1	61	7.5	3	3	0.003	10	17.6	11.67	120.4	3.00	0.85	2.36	1.89	4.52	0.81	0.89	1.09877
A315	0	1	64	1	3	1	176	107	1	7.2	7.39	1	62	5.2	2	2	0.012	77.6		19.44	154.4	1.5	1.04	1.77	1.07	3.56	0.79	0.66	0.835443
A316	0	1	81	1	1	2	175	113	2	6	7.19	2	66	2.3	1	1	0.169	114.9	141		75.4	3.54	0.82	1.58	0.92	3.13	0.58	0.59	1.01724
A317	0	1	76	3	3	1	128	86	2	6	3.94	1	64	6.1	2	2	0.007	630		19.74	317.2	3.00	1.12	2.3	0.77	4.27	1.01	0.84	0.831683
A318	0	1	64	3	3	1	137	88	2		4.39	2	66	3.8	1	1	0.002	12.6			87.7		1.06	3.51	1.15	5.95	0.95	1.22	1.28421
A319	0	1	80	3	3	2	120	82	2	5.8	6.35	2	65	3.4	1	1				7.86	88.7		1.31	3.02	0.85	5.47	1.04	1.01	0.971154
A320	0	1	67	1	1	2	168	70	2	5.9	5.26	2	64	5.8	2	2	0.004	122.6	108.02	8.49	50		1.26	1.99	0.84	4.06	1	0.72	0.72
A321	0	2	75	3	3	2	113	65	2	5.8	2.97	1	52	4	1	2	19.877	2511.4	139.74	12.17	991		0.79	1.16	1.49	3.07	0.63	0.54	0.857143
A322	0	1	61	2	3	1	165	100	2	6.2	7.48	2	61	2.4	1	1	0.002	59.5		22	108	0.43	1.16	2.46	0.68	4.1	1.02	0.61	0.598039
A323	0	1	74	3	3	1	170	100	2		4.92	1	61	7.2	3	3	0.009				112.7		0.72	2.57	2.99	5.46	0.81	0.87	1.07407
A324	0	2	52	3	3	2	107	74	2	5.7	4.22	2	64	5.7	2	2	0.002	105		13.8	78	0.75	1.35	2.61	0.64	4.53	1.03	0.84	0.815534
A325	0	1	64	2	3	2	131	90	2		4.16	1	60	2.9	1	1	0.004	695		15.5	101	5.00	1.44	3.5	1.02	5.75	1.22	1.04	0.852459
A326	0	2	76	3	3	1	149	93	2	6.3	4.7	1	66	5.1	2	2	0.006	197.6	5.12	10.74	87.4	2.99	1.89	1.92	1	4.93	1.44	0.65	0.451389
A327	0	1	61	3	3	1	146	88	2		5.6	1	64	5.94	2	2		20.5			195.5	1.41
A328	0	1	72	3	3	1	166	107	2	6	6.5	2	60	7	2	2			105		52.3	3
A329	0	1	80	3	3	1	150	86	1	7.6	7.32	1	58	3.1	1	1	0.01	3323	110.1	20.1	156		0.8	4.25	1.27	5.77	0.7	1.53	2.18571
A330	0	1	86	2	3	1	124	68	2	6.2	4.46	1	20	6	2	2	8.448	4039.8	54.97	23.77	59.4	>3.00	0.86	1.93	1.16	3.63	0.74	0.75	1.01351
A331	0	1	72	1	3	1	164	87	2		4.24	1	34	2.1	1	1					77.2		1.24	1.66	0.8	3.57	1.05	0.58	0.552381
A332	0	2	98	3	3	2	107	65	2		4.67	1	60	4.9	1	2					53.8		0.95	2.61	1.34	4.9	0.79	1	1.26582
A333	0	1	72	1	3	1	111	100	2	5.2	4.26	1	63	10	3	3	0.424		52.5	29.49	77.7		0.97	4.55	1.3	6.69	0.72	1.39	1.93056
A334	0	1	80	3	3	1	164	81	2		4.42	1	61	4.3	1	2	0.006	103.2		10.37	102	1.72	0.18	2.1	3.17	5.06	0.33	0.93	2.81818
A335	0	1	51	3	3	2	115	78	2		4.67	2		3.1	1	1		52.9			106	1.87	1.27	2.06	1.19	4.04	1.03	0.67	0.650485
A336	0	1	66	1	3	1	105	73	2	6.4	8.26	1	67	6.2	2	2	0.002	101		15.7	84.8	3.99	1.57	3.11	1.22	5.54	1.22	1.14	0.934426
A337	0	2	75	3	3	1	164	94	2	5	3.62	1		4	1	2	0.36	976		52.5	85.6		1.23	1.62	0.91	3.35	0.85	0.6	0.705882
